# Supplementary material for: A shared Runx1-bound Zbtb16 enhancer directs innate and innate-like lymphoid lineage development
Source: Springer Nature journal article supplement (doi:10.1038/s41467-017-00882-0), 2017-10-05
Supplement: MOESM1 [file 41467_2017_882_MOESM1_ESM.pdf › 41467_2017_882_MOESM1_ESM.pdf]

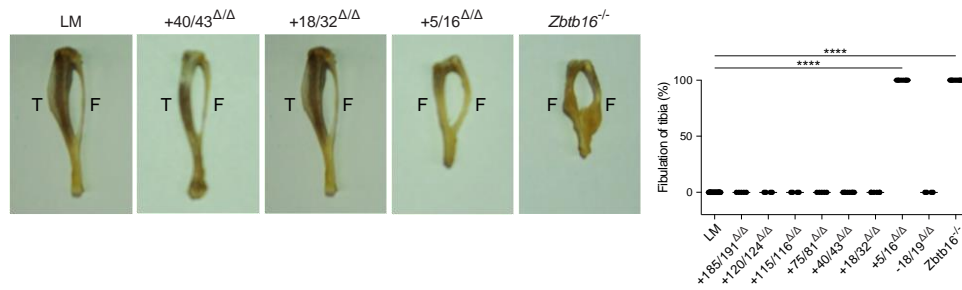

**Supplementary Figure 1. Zeugopod abnormalities in deletion mutant mice.** Left, the fibulation of tibia observed in +5/16 $\Delta/\Delta$  deletion mutant mice is identical to the PLZF $^{-/-}$  luxoid defect. Right, summary plot of zeugopod abnormalities among deletion mutant mice. Summary data are pooled from 15 separate experiments, with a total of four to 42 mice in each group. Statistical analysis was performed using one-way ANOVA for multiple comparisons to WT littermate controls (LM). \*,  $P < 0.05$ , \*\*,  $P < 0.01$ , \*\*\*,  $P < 0.001$ , \*\*\*\*,  $P < 0.0001$ .

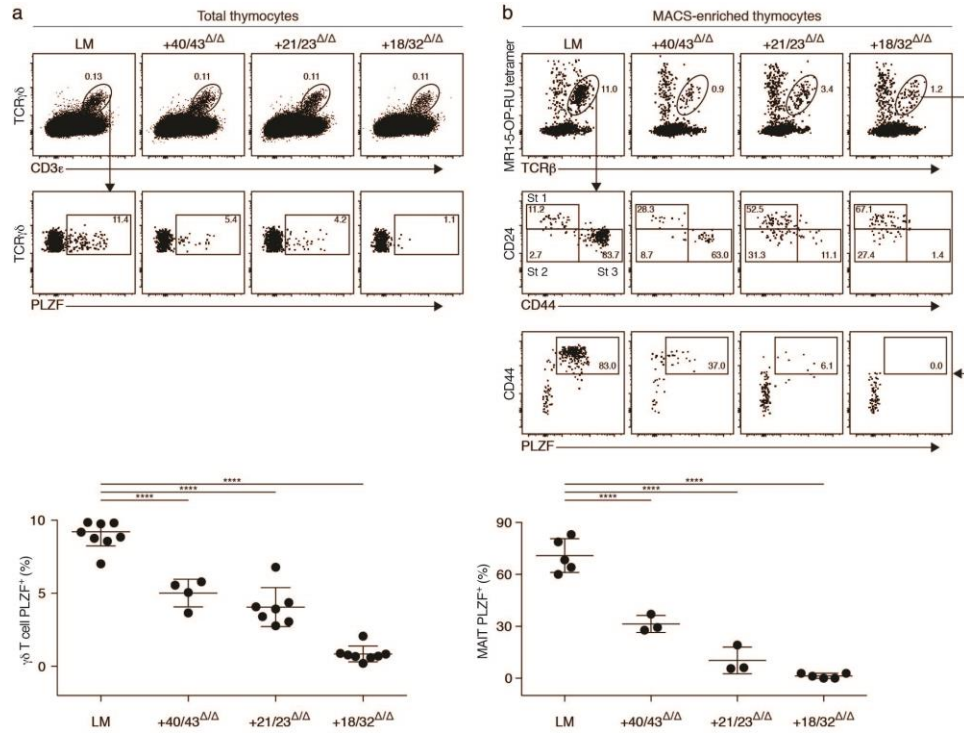

**Supplementary Figure 2. PLZF expression in  $\gamma\delta$ T and MAIT thymocytes of +40/43 $\Delta/\Delta$ , +21/23 $\Delta/\Delta$ , +18/32 $\Delta/\Delta$  mice. (a) thymic  $\gamma\delta$ T cells. (b) thymic MAIT cells after MACS-enrichment with MR1-5-OP-RU tetramers. Data were compiled from four independent experiments with three to eight mice in each group. Statistical analysis was performed using one-way ANOVA for multiple comparisons. \*,  $P < 0.05$ , \*\*,  $P < 0.01$ , \*\*\*,  $P < 0.001$ , \*\*\*\*,  $P < 0.0001$ .**

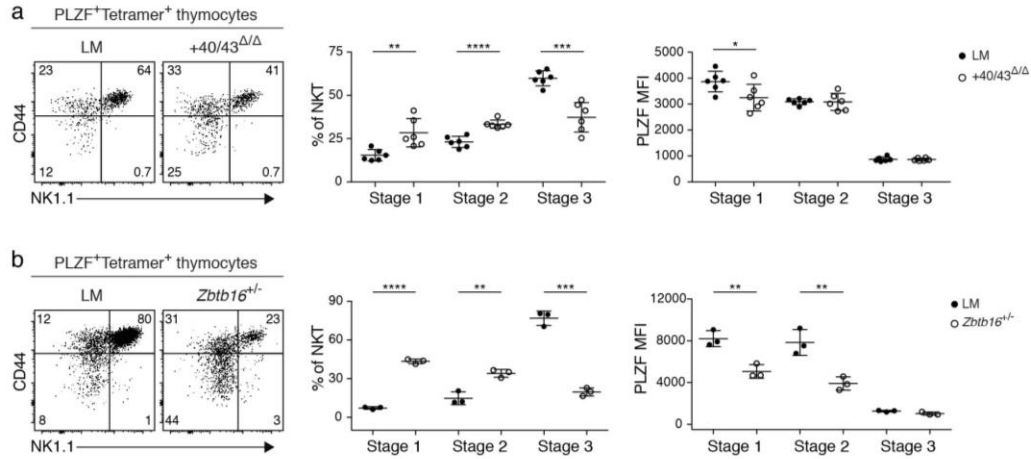

**Supplementary Figure 3. NKT cell defects in +40/43 $\Delta\Delta$  and PLZF<sup>+/-</sup> mice.** Additional batches of mice were examined in independent experiments to confirm results shown in **Fig. 2b** and **Fig. 2c**. Summary data are pooled from two separate experiments, with a total of three to six mice in each group. Two-tailed Student's t test was performed for statistical analysis. \*,  $P < 0.05$ , \*\*,  $P < 0.01$ , \*\*\*,  $P < 0.001$ , \*\*\*\*,  $P < 0.0001$ .

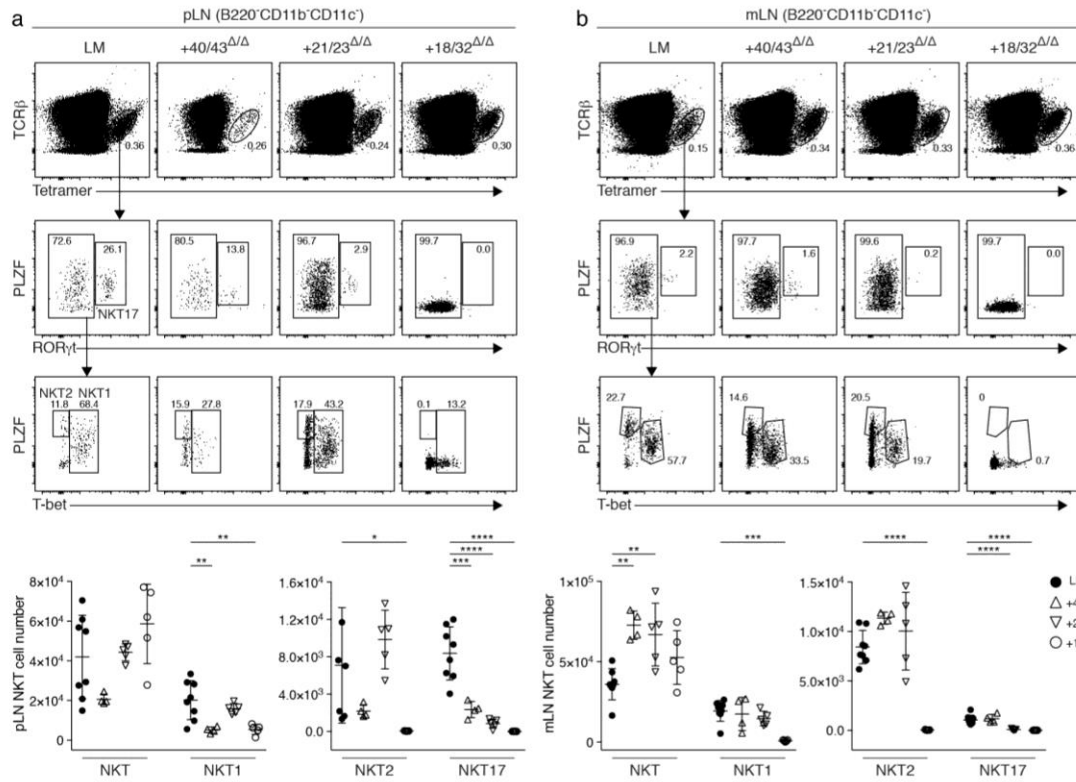

**Supplementary Figure 4. NKT sublineages in lymph nodes of mutant mice.** FACS analysis of TF expression by NKT cells from peripheral axillary and inguinal lymph nodes (pLN) (**a**) and mesenteric lymph nodes (mLN) (**b**) of mice carrying the indicated enhancer deletions. Summary plots combining four independent experiments, with four to eight mice in each group. Statistical analysis was performed using one-way ANOVA for multiple comparisons to WT LM. \*,  $P < 0.05$ , \*\*,  $P < 0.01$ , \*\*\*,  $P < 0.001$ , \*\*\*\*,  $P < 0.0001$ .

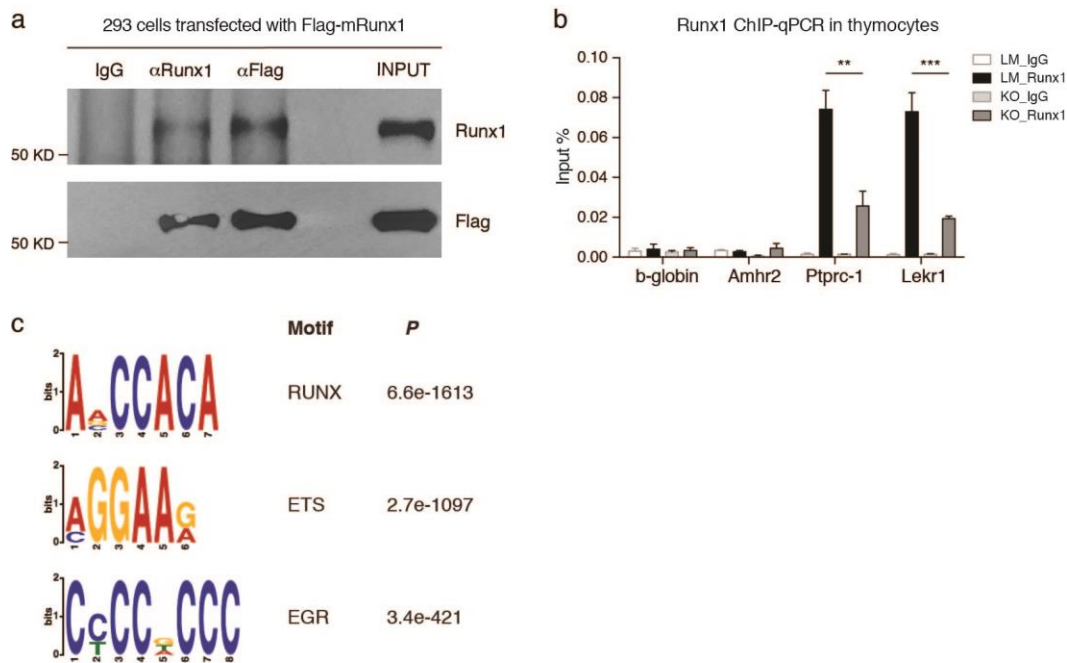

**Supplementary Figure 5. Specificity of ab23980 anti-Runx1 antibody from Abcam.**

(a) IP/WB analysis of 293 cells transfected with mouse Flag-Runx1 construct. (b) Runx1 ChIP-qPCR of LM or Cd4-Cre Runx1<sup>fl/fl</sup> whole thymocytes. Note that the Cd4-Cre Runx1<sup>fl/fl</sup> thymocytes have some residual Runx1 signal from DN thymocytes which express high Runx1. Two-tailed Student's t test was performed for statistical analysis. \*,  $P < 0.05$ , \*\*,  $P < 0.01$ , \*\*\*,  $P < 0.001$ , \*\*\*\*,  $P < 0.0001$ . (c) The top three motifs identified by MEME-ChIP for Runx1 ChIP-seq peaks. We extracted 200 bp centered on all Runx1 ChIP-seq peaks and used as input for MEME-ChIP, set to use the Vertebrate (In vivo and in silico) motifs. The  $P$  value of Fisher's Exact Test for enrichment of the motif in the positive sequences is used.

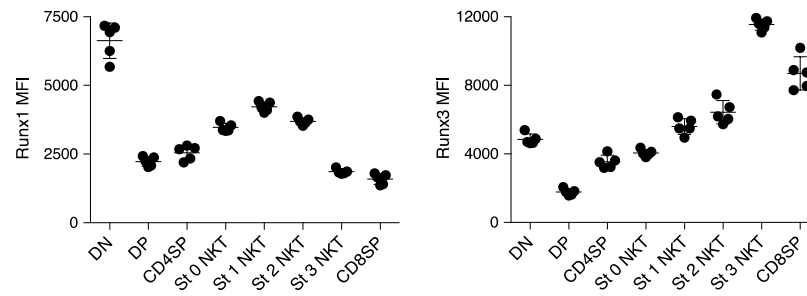

**Supplementary Figure 6. Opposite expression patterns of Runx1 and Runx3 in NKT thymic stages.** Flow cytometry analysis of intracellular Runx1 (left) and Runx3 (right). DN, DP, CD4SP and CD8SP are shown for reference. Five mice from two independent experiments were used for both Runx1 and Runx3 staining.

**Supplementary Table 1.** sgRNA and corresponding deletions.

| Region   | sgRNA                | mm10 Chr9 sequence deletion |
|----------|----------------------|-----------------------------|
| -18/19   | GGCTATGCACACAAGCTCGG | 48,853,652-48,854,902       |
|          | GGTAAATAGAAGCGGGGTAG |                             |
| +5/16    | GGGGATAGGCACAAGAGCTC | 48,819,509-48,830,792       |
|          | GGACGCGGGGCGAAAATGAT |                             |
| +18/32   | GGTACCTCTTCACATGTGTA | 48,804,391-48,818,263       |
|          | GGAGGGTTAGCTTAGACTTT |                             |
| +40/43   | GGCGACCACATGTTACAGCC | 48,793,359-48,795,508       |
| +75/81   | GGTAATGAACTAGAACGCCA | 48,754,891-48,761,059       |
|          | GGTTGAGCTTTCTGAGGGGT |                             |
| +115/116 | GGCTAATGATTCAGGATAAG | 48,719,978-48,720,522       |
|          | GGTGCAAGTGTCTCCAGGAG |                             |
| +120/124 | GGCTAAGTGGAGTCGGAAGG | 48,711,497-48,715,805       |
|          | GGCCCCATTTCCTATCTCAC |                             |
| +185/191 | GGGAAGCCCCGAGTGCTGT  | 48,645,074-48,650,422       |
|          | GGTGCTCTCCCCTGCAGCCG |                             |
| +18/21   | GGGCTATATCCTGGGATGAC | 48,815,241-48,818,255       |
|          | GGAGGGTTAGCTTAGACTTT |                             |
| +21/23   | GGACCTTCCATTCACGCTAA | 48,813,509-48,815,241       |
|          | GGGCTATATCCTGGGATGAC |                             |
| +23/29   | GGGACACGTCTCATGTATAA | 48,806,974-48,813,530       |
|          | GGACCTTCCATTCACGCTAA |                             |
| +29/31   | GGGCCTGGTCTACTTCCCAT | 48,805,350-48,806,976       |
|          | GGGACACGTCTCATGTATAA |                             |
| +31/32   | GGTACCTCTTCACATGTGTA | 48,804,389-48,805,356       |
|          | GGGCCTGGTCTACTTCCCAT |                             |
| 1-338    | GGGGGGGACACAGTTTGTCT | 48,814,366-48,814,703       |
|          | GGCTGTTTGCCCGATGGATC |                             |
| 339-730  | GGCTGTTTGCCCGATGGATC | 48,814,704-48,815,095       |
|          | GGAGTTTTGAGGGTAACTAA |                             |
| 1-730    | GGGGGGGACACAGTTTGTCT | 48,814,366-48,815,095       |
|          | GGAGTTTTGAGGGTAACTAA |                             |

**Supplementary Table 2.** Primers used for Runx1 ChIP-qPCR.

| Primer name       | Primer sequence           |
|-------------------|---------------------------|
| Zbtb16_A_F        | AAGTCATCAGCGGAGTCTTCTC    |
| Zbtb16_A_R        | AAGTATCAGGCCAAGTGAGGTG    |
| Zbtb16_B_F        | ACCCAATAGTGCTGTGAGCTTC    |
| Zbtb16_B_R        | TCTGCCATGAAAGTGAGATGC     |
| Zbtb16_C_F        | CCTCTGCTCAGTGGTTAAGTCG    |
| Zbtb16_C_R        | AGATGCGTGGCCAAGATAGAG     |
| Zbtb16_D_F        | AGGTTTACACATCTCACCACAAGAC |
| Zbtb16_D_R        | CGAGCTTTGAACAGTGGAGAG     |
| Zbtb16_E' _F      | GAGATGCCCAGACAAACTGTG     |
| Zbtb16_E' _R      | TGTGGTTGGATAAAGGAAGCTC    |
| Zbtb16_E_F        | TGAGCTTCCTTTATCCAACCAC    |
| Zbtb16_E_R        | AATGTCTGCAAACCGACAGTG     |
| MyoD1_F           | TGCCATTGAGAGGCAAAGTC      |
| MyoD1_R           | TATTCTCTGAGCCCTCTCATGC    |
| Lekr1_F           | GGCAAGCTGTACACTTTCAGG     |
| Lekr1_R           | AGGGCTAAGATGTAGGTCAGTGG   |
| Ptprc_1_F         | TCTTCTCCTCGCACACTTCTG     |
| Ptprc_1_R         | GTTGCACCATTTGGAAGCTC      |
| Ptprc_2_F         | AAAGACAGGCCAATCCTTCC      |
| Ptprc_2_R         | ACCCGTGGCTTTGTATACTGTG    |
| Gapdh_F           | TCGTCTCTGAACCCCTCTTCC     |
| Gapdh_R           | CAAATCAGCCTCCCTTCTCC      |
| Amhr2_F           | ATTCTCTGCTCCTCCCTTTCTC    |
| Amhr2_R           | TCTGTCCTATCCCGGTCTCTG     |
| $\beta$ -globin_F | GCCATCGTTAAAGGCAGTTATCA   |
| $\beta$ -globin_R | TGCTATCATGGGTAATGCCAAA    |
